# Supplementary material for: Genome-wide analysis of BpDof genes and the tolerance to drought stress in birch (Betula platyphylla)
Source: PeerJ. 2021 Aug 24;9:e11938. doi: 10.7717/peerj.11938 (PMC8395574; doi:10.7717/peerj.11938)
Supplement: Supplemental Information 3 [file peerj-09-11938-s003.xlsx]

## Sheet: Sheet1
Table S3. Primers of qRT-PCR assay used for Differential expression genes.
Primer	Sequence (5’-3’)	Amplicon size (bp)
Ubiquitin-F	GGAGGACAAGGTGGAGGG	228
Ubiquitin-R	GATTGAGGGGAGGGATGC
a-tubulin-F	TGGCTCGAATGCACTGTTGG	215
a-tubulin-R	TCAACCGCCTTGTCTCTCAGG
Dof1-G-F	TCCTCAACAACAACCTCGTC	153
Dof1-G-R	GCCTTTCGTCCAATACCG
Dof2-G-F	GGTTTGGGTTGGGCAGTA	160
Dof2-G-R	GCAAGGTCCGTGGAAGCA
Dof3-G-F	GTCAATGAAAGCCAACGG	165
Dof3-G-R	TCACCTCCACAAGAAACTG
Dof4-G-F	CGTTGGAGGCTTTGTTGA	165
Dof4-G-R	CGTCGGTTATTAGATTCGTAG
Dof5-G-F	GCAAGGGCTGTAGAAGGT	157
Dof5-G-R	ATTGGGTCATTTGGGAGC
Dof6-G-F	GCGGATTTCAGCCTCCTG	195
Dof6-G-R	TCGCCTCAACATTCTCACC
Dof7-G-F	CAGCAGCCAAATCATCCA	199
Dof7-G-R	AGTCGCATCTTGGGCATT
Dof8-G-F	TTCACGAGCCTCATAACGG	193
Dof8-G-R	TCTGATCCAGCAGCCCAC
Dof9-G-F	TCATCCGGGTTTCCTTTC	182
Dof9-G-R	CCCTGTCCCTTACTCTGC
Dof10-G-F	GCTTCTCACAGGGCTTAC	194
Dof10-G-R	GCCTCCCACTATTCTCAT
Dof11-G-F	GAGTAATGCTGCAACGAC	159
Dof11-G-R	GAATCAATCTCACCCAAA
Dof12-G-F	GTGGAACCCGCAAGAACA	197
Dof12-G-R	TGCCAGAAGCGAGCTGAA
DOF13-G-F	AAAGGCACTGGACTAAGGG	171
DOF13--G-R	CAAGCGAAACAGGGAGATT
DOF14-G-F	CCCTCCTGGGTTTCCTATGC	176
DOF14-G-R	CCTGTCTTGGATGCTGCTCT
DOF15-G-F	TTGCGGTGCTATTTGGCGGAG	155
DOF15-G-R	CTCCGTCGCTATCTGATCGC
DOF16-G-F	CCAAGACCACCCATAACCCG	165
DOF16-G-R	TCCCGCCGTGAGTCCAGTAG
DOF17-G-F	TAGGCATTTCTGTAAGGG	159
DOF17-G-R	TCAAAGTCAAACTGGTGG
DOF18-G-F	TGACAAACCCACCACCTAC	140
DOF18-G-R	GGAAGACAAATAACCACCTC
DOF19-G-F	TCCATTTCCCACCAGGTTC	154
DOF19-G-R	CCCATTTCGGTAATCGTTC
DOF20-G-F	CCAACGATCAACCCATGACC	173
DOF20-G-R	CATACCATGATACCTGGCGTC
DOF21-G-F	CAAAGATACTGGACTGCTGGTG	189
DOF21-G-R	CGAGCCAAAGGTGAGGAC
DOF22-G-F	GGCTTTCTCATCTGTTCCAG	187
DOF22-G-R	TATCTTGGCTAACCTGGC
DOF23-G-F	CCAGATGACCATCTTACCCC	166
DOF23-G-R	CACCTGGCATCGTACTACTC
DOF24-G-F	CGTCATCTCAGCTCTCAGCC	200
DOF24-G-R	CTGAAGATGACTCCCATACC
DOF25-G-F	CACCAGAGAGTTCCGATGATG	198
DOF25-G-R	GGTTGGTGTCGTAGGTGGAAC
DOF26-G-F	GGTCCTGAAGCACCTCTTTG	156
DOF26-G-R	TTGATTTCCCTGATTACTGG
