# Supplementary material for: Genome-wide analysis of BpDof genes and the tolerance to drought stress in birch (Betula platyphylla)
Source: PeerJ. 2021 Aug 24;9:e11938. doi: 10.7717/peerj.11938 (PMC8395574; doi:10.7717/peerj.11938)
Supplement: Supplemental Information 4 — BpDofx-F/R gene primer pROKII-BpDofx-I-F/R:vector construction primer (In-Fusion Cloning) [file peerj-09-11938-s004.xlsx]

## Sheet: Sheet1
Table S4. Primers used for BpDof4, BpDof11, and BpDof17 amplification and vector construction.
Primer	Sequence (5’-3’)
BpDof4-F	ATGTTTGGTCAGCAAACGTT
BpDof4-R	TTAAGGTCTTGAAAAAACCT
BpDof11-F	ATGTCGTCTGCCCATTCACT
BpDof11-R	CTACATGAGAGGGCTATTAAG
BpDof17-F	ATGGCTAACGTTAACGGCG
BpDof17-R	TCAAGGGCATGCTTGACCAC
pROKII-BpDof4-I-F	CTCTAGAGGATCCCCGGGATGTTTGGTCAGCAAACGTT
pROKII-BpDof4-I-R	TCGAGCTCGGTACCCGGGTTAAGGTCTTGAAAAAACCT
pROKII-BpDof11-I-F	CTCTAGAGGATCCCCGGGATGTCGTCTGCCCATTCACT
pROKII-BpDof11-I-R	TCGAGCTCGGTACCCGGGCTACATGAGAGGGCTATTAAG
pROKII-BpDof17-I-F	CTCTAGAGGATCCCCGGGATGGCTAACGTTAACGGCG
pROKII-BpDof17-I-R	TCGAGCTCGGTACCCGGGTCAAGGGCATGCTTGACCAC
BpDofx-F/R：gene primer pROKII-BpDofx-I-F/R:vector construction primer (In-Fusion Cloning)
