# Supplementary material for: Genome-wide analysis of BpDof genes and the tolerance to drought stress in birch (Betula platyphylla)
Source: PeerJ. 2021 Aug 24;9:e11938. doi: 10.7717/peerj.11938 (PMC8395574; doi:10.7717/peerj.11938)
Supplement: Supplemental Information 8 [file peerj-09-11938-s008.xlsx]

## Sheet: plant height
	days after treatment /d		different concentration of melatonin
	0	Repetitions	CK	S	S+MT50	S+MT100	S+MT200	S+MT500
		1	7.4	7.5	7.9	7.7	7.9	8.1
		2	7.7	7.5	8.2	8.5	7.5	7.6
		3	7.8	8.5	7.5	7.5	8.2	7.6
		4	8.1	7.5	7.5	7.5	7.5	7.9
		5	7.9	8.1	7.9	7.5	7.9	8.1
		6	8.1	7.7	8.2	8.1	8.2	7.5
		AVE	7.83333	7.8	7.86667	7.8	7.86667	7.8
		SD	0.24267	0.378594	0.286744	0.378594	0.286744	0.244949
	3	Repetitions	CK	S	S+MT50	S+MT100	S+MT200	S+MT500
		1	9.5	9.3	6.6	9.3	9.6	9
		2	9.5	9.2	9.6	10.6	9.6	8.3
		3	9.2	8.6	9.5	7.7	10.5	9.2
		4	10	8.6	10.5	7.5	10	10.3
		5	8.5	7	8.3	11.2	9.5	9.5
		6	12.5	6.9	9.6	10.5	10	10.2
		AVE	9.86667	8.26667	9.01667	9.46667	9.86667	9.41667
		SD	1.26051	0.968963	1.25621	1.43604	0.344803	0.691416
	6	Repetitions	CK	S	S+MT50	S+MT100	S+MT200	S+MT500
		1	10.9	8.7	8.3	11.2	10.8	9.5
		2	10.8	9.8	10.3	11.2	10.9	10.5
		3	12.4	8.7	10.9	9.6	10.7	9.7
		4	12.7	9.8	9.7	11.2	10.8	10.8
		5	12.8	8.6	10.2	10.2	11.3	11.9
		6	11.9	9.1	9.8	10.7	11.8	10.5
		AVE	11.9167	9.11667	9.86667	10.6833	11.05	10.4833
		SD	0.807087	0.507992	0.801388	0.606676	0.386221	0.784042
	9	Repetitions	CK	S	S+MT50	S+MT100	S+MT200	S+MT500
		1	12.3	11.3	12.5	13.3	11.4	11.1
		2	13.6	9.9	9.3	11.3	13.5	11.4
		3	14	10.3	13.4	11.4	11.2	12.1
		4	11.3	9.2	9.4	11.7	11.6	12.4
		5	12.7	10.4	12.8	11.4	13.1	10.6
		6	15.2	10.2	10.9	12.6	12.4	13.2
		AVE	13.1833	10.2167	11.3833	11.95	12.2	11.8
		SD	1.25621	0.625611	1.62421	0.745542	0.869866	0.866025
	12	Repetitions	CK	S	S+MT50	S+MT100	S+MT200	S+MT500
		1	14.2	11	13.5	12.5	14.3	13.5
		2	15.8	10	12.5	14.5	14.5	12.5
		3	17	13	11.2	15.4	14	14.6
		4	16.5	11.2	12.6	13.5	14.5	13.9
		5	14.5	11.5	13.8	13.2	15.3	14.1
		6	14.3	12.5	11.8	13.9	14.2	13.7
		AVE	15.3833	11.5333	12.5667	13.8333	14.4667	13.7167
		SD	1.10968	0.986013	0.899383	0.930352	0.410961	0.643989
	Explanation：This figure is the raw data of plant height determination. We set up six repetitions in each experiment to ensure the reliability of the results, and finally take the average as the final result.

## Sheet: Sheet 1
	Table S6. The expression values of BpDofs in response to drought stress by qRT-PCR.
				BpDof1	BpDof2	BpDof3	BpDof4	BpDof5	BpDof6	BpDof7	BpDof8	BpDof9	BpDof10	BpDof11	BpDof12	BpDof13	BpDof14	BpDof15	BpDof16	BpDof17	BpDof18	BpDof19	BpDof20	BpDof21	BpDof22	BpDof23	BpDof24	BpDof25	BpDof26
	Root		0.5H-R	2.82765	2.24108	2.98678	3.88865	0.177983	2.52668	1.84885	1.76682	0.848117	1.3354	6.42542	2.43365	2.63685	1.65685	2.36685	2.18685	7.63517	2.29685	2.47685	2.46685	2.34685	1.95685	2.45685	2.34685	3.08685	2.27685
			1H-R	1.40923	1.4272	1.55608	-0.788767	0.955817	1.97317	0.650367	0.194967	-0.512767	1.24358	6.06437	1.40233	3.66863	2.74863	3.32863	2.96863	6.01517	3.25863	3.49863	3.83863	2.73863	-0.961367	-1.23137	3.72863	0.658633	3.38863
			3H-R	2.20512	1.9836	3.11683	1.37325	0.0148	2.42413	2.05963	1.37457	1.05033	1.00125	5.32857	1.09017	0.228467	0.288467	-0.231533	6.66847	7.19517	1.07847	6.29847	0.878467	0.0284666	1.38347	1.79847	-0.141533	1.69847	0.0284666
			6H-R	1.26913	1.05753	0.246033	-0.03915	-0.0651333	0.9298	1.02457	0.538967	0.131417	0.67095	4.90163	0.671233	1.30583	1.41583	1.82583	1.81583	5.33517	6.83583	5.09583	1.46583	1.56583	0.990833	1.58083	1.63583	1.74583	3.00583
			12H-R	5.28158	1.342	2.13165	-1.816	5.83768	0.296633	-1.15958	-1.19037	0.724183	0.3874	5.47735	5.54475	5.05495	-1.82505	1.98495	5.87495	7.31517	2.17495	6.57495	8.14495	4.88495	5.66495	4.76495	6.44495	4.46995	5.58495
			24H-R	2.5802	1.98715	4.44555	-0.6679	-1.18402	2.12543	2.32473	0.287583	0.410433	0.88275	4.89905	2.661	1.75605	0.73605	2.22605	1.69605	5.65517	2.66605	2.47605	3.17605	2.11605	2.49605	2.38605	2.41605	1.96605	2.17605
	Stem		0.5H-S	-0.756267	-0.159567	-0.495433	-3.0183	-0.89405	-0.762233	-0.710433	-0.6347	0.572367	0.142967	-0.1138	-0.3591	-0.1601	-0.0501	-0.0501	0.0699	-0.413433	1.788	0.778	-0.968667	0.768	0.639667	-0.520333	1.778	-1.062	1.558
			1H-S	-0.741117	0.0148667	-1.00323	0.5265	-1.49585	0.8984	1.0327	-0.110867	0.455133	0.485617	0.81875	-0.218	1.0579	0.4879	1.9479	1.1479	1.49623	1.6217	0.7317	-0.844967	0.3517	0.338367	-0.136633	1.3817	0.0917	2.0917
			3H-S	-0.6951	-0.506	-0.466783	0.2532	-0.513	-0.4057	-0.3944	-0.264567	0.177867	0.238233	-1.099	-0.3254	0.2016	-0.5984	0.8616	0.0116	1.39493	0.588667	0.408667	1.912	-0.321333	0.355333	0.358667	1.64867	0.678667	1.19867
			6H-S	-1.49327	-0.375533	-0.3192	-0.635867	-0.139533	-0.769267	1.71557	-0.756567	0.114467	-0.1232	-1.36873	-0.368633	0.568567	0.248567	0.518567	0.708567	1.7119	1.54342	0.943417	-0.216583	1.23342	2.10508	-0.864917	2.97342	0.143417	1.63342
			12H-S	-1.21598	-0.405717	2.68408	-1.63525	-4.65508	-0.67605	1.78627	-0.270617	-0.52515	-0.132217	-1.67198	-1.09998	1.29332	1.32332	1.03332	0.913317	1.63665	0.31675	0.47675	0.73675	0.84675	2.80842	1.17675	0.78675	1.81675	0.26675
			24H-S	-1.86792	-1.73748	0.240517	-1.85135	-2.69535	-0.29805	1.70425	-0.72475	-0.49685	0.0748167	-0.83575	-1.1351	0.02665	0.06665	1.47665	0.40665	0.523317	0.5925	-0.2175	-0.5325	-0.6575	0.209167	-0.935833	0.8325	0.6225	-0.0375
	Leaves		0.5H-L	-0.577267	-1.14373	-0.625733	8.3311	6.08565	-0.993867	-1.78573	0.2383	0.345333	-0.09205	-1.1272	-0.8287	1.2583	6.7283	1.2883	0.5983	4.4683	0.7733	-2.20957	-1.5917	-0.0817	1.3083	-4.6917	-5.5817	-2.5617	1.3183
			1H-L	0.416033	0.4415	0.512867	4.4921	3.41313	0.339533	0.4206	0.788667	0.397033	0.6956	-1.07147	-0.477167	0.551033	2.14103	0.371033	0.381033	0.951033	-1.32897	0.473167	0.971033	0.511033	0.361033	-4.05897	-4.98897	1.32103	1.31103
			3H-L	0.4667	0.9005	0.671433	5.10358	0.897383	1.20327	0.492967	0.9416	0.608933	0.959933	-0.916467	0.373833	1.31523	2.62523	1.73523	1.68523	3.56523	-0.854767	-2.80263	0.265233	1.16523	1.06523	1.38523	-2.23477	1.54523	1.65523
			6H-L	0.0411833	0.814867	0.810333	4.60727	0.481683	0.495133	0.724367	0.488533	-0.408467	0.7218	-1.02817	0.0460333	0.612333	1.52233	0	0.302333	3.63233	2.40233	1.62447	-0.0976667	0.0423333	-0.157667	0.202333	-1.70767	0.292333	0.822333
			12H-L	-3.064	-3.53063	-0.854167	0.328067	-1.44837	-2.954	-1.65523	-1.48887	-2.95367	-1.55753	-4.06807	-3.53483	-2.70937	-0.719367	-2.33937	-1.96937	-1.71937	-2.85937	-4.00723	-3.84937	-2.08937	-1.47937	-2.08937	-2.38937	-1.98937	-1.80937
			24H-L	-1.31048	-0.500117	1.25735	2.34348	-1.77125	-1.02312	-0.740783	-0.461133	-1.6896	0.5609	-2.34285	-1.28165	-0.0848499	0.44515	0.12515	-0.25485	5.87515	-0.74485	-2.31272	-1.10485	-0.88485	0.41515	-0.67485	-1.77485	-0.96485	-0.54485
