# Supplementary material for: Genome-wide analysis of BpDof genes and the tolerance to drought stress in birch (Betula platyphylla)
Source: PeerJ. 2021 Aug 24;9:e11938. doi: 10.7717/peerj.11938 (PMC8395574; doi:10.7717/peerj.11938)
Supplement: Supplemental Information 9 [file peerj-09-11938-s009.xlsx]

## Sheet: Sheet1
	Tab S7. Physiological indexes of birch in WT, BpDof4-, BpDof11-, and BpDof17-overexpressing plants under drought stress
	H2O2 Activity（mmol/gprot ）					POD Activity（U/mgprot ）					SOD Activity（U/g FW ）					Electrolyte leakage(%）
	WT	Repetitions	Control	PEG		WT	Repetitions	Control	PEG		WT	Repetitions	Control	PEG		WT	Repetitions	Control	PEG
		1	14.679	67.072			1	25.5762	93.3935			1	612.434	961.722			1	3.16	15.8667
		2	13.403	68.72			2	32.3362	84.4765			2	607.37	965.568			2	4.79	17.8267
		3	16.621	69.175			3	25.3862	81.2875			3	690.178	1152.77			3	5.07	13.1967
		AVE	14.901	68.3223			AVE	27.7662	86.3858			AVE	636.661	1026.69			AVE	4.34	15.63
		SD	1.32309	0.903422			SD	3.23241	5.12334			SD	37.8985	89.1696			SD	0.84218	1.89758
	BpDof4	Repetitions	Control	PEG		BpDof4	Repetitions	Control	PEG		BpDof4	Repetitions	Control	PEG		BpDof4	Repetitions	Control	PEG
		1	15.987	54.0927			1	24.972	116.79			1	678.789	969.261			1	3.22	12.6367
		2	13.51	54.0967			2	22.648	115.336			2	683.005	985.132			2	5.19	11.2267
		3	16.631	57.5637			3	32.751	126.397			3	599.811	1142.88			3	3.25	15.4967
		AVE	15.376	55.251			AVE	26.7903	119.508			AVE	653.868	1032.42			AVE	3.88667	13.12
		SD	1.3454	1.6353			SD	4.32029	4.90753			SD	38.263	78.3722			SD	0.921677	1.77641
	BpDof11	Repetitions	Control	PEG		BpDof11	Repetitions	Control	PEG		BpDof11	Repetitions	Control	PEG		BpDof11	Repetitions	Control	PEG
		1	15.384	42.3401			1	27.728	144.54			1	591.651	1545.86			1	4.3	10.96
		2	17.035	43.9221			2	24.343	142.807			2	657.87	1377.91			2	5.37	12.79
		3	14.217	44.6641			3	32.368	153.679			3	677.67	1343.58			3	3.77	13.57
		AVE	15.5453	43.6421			AVE	28.1463	147.009			AVE	642.397	1422.45			AVE	4.48	12.44
		SD	1.15609	0.969207			SD	3.28952	4.7694			SD	36.782	88.3822			SD	0.665482	1.09389
	BpDof17	Repetitions	Control	PEG		BpDof17	Repetitions	Control	PEG		BpDof17	Repetitions	Control	PEG		BpDof17	Repetitions	Control	PEG
		1	16.394	63.723			1	22.569	131.389			1	613.635	905.481			1	4.54	14.4767
		2	13.491	65.228			2	23.515	135.715			2	636.517	1196.91			2	6.1	17.0867
		3	16.407	61.63			3	33.575	121.611			3	694.248	1012.09			3	4	13.0467
		AVE	15.4307	63.527			AVE	26.553	129.572			AVE	648.133	1038.16			AVE	4.88	14.87
		SD	1.37156	1.4754			SD	4.9803	5.89959			SD	33.9197	120.393			SD	0.890393	1.67261
	Explanation：This figure is the raw data of H2O2 activity determination. We set up three repetitions in each experiment to ensure the reliability of the results, and finally take the average as the final result.					Explanation：This figure is the raw data of POD activity determination. We set up three repetitions in each experiment to ensure the reliability of the results, and finally take the average as the final result.					Explanation：This figure is the raw data of SOD activity determination. We set up three repetitions in each experiment to ensure the reliability of the results, and finally take the average as the final result.					Explanation：This figure is the raw data of Electrolyte leakage determination. We set up three repetitions in each experiment to ensure the reliability of the results, and finally take the average as the final result.
